# Supplementary material for: Early Double-Strand Break Signaling is asynchronous and accelerated at complex breaks
Source: Research Square preprint supplement (doi:10.21203/rs.3.rs-8040129/v1), 2025-11-20
Supplement: Supplementary file 1 [file d145172e3447d630ad1a577b.docx]

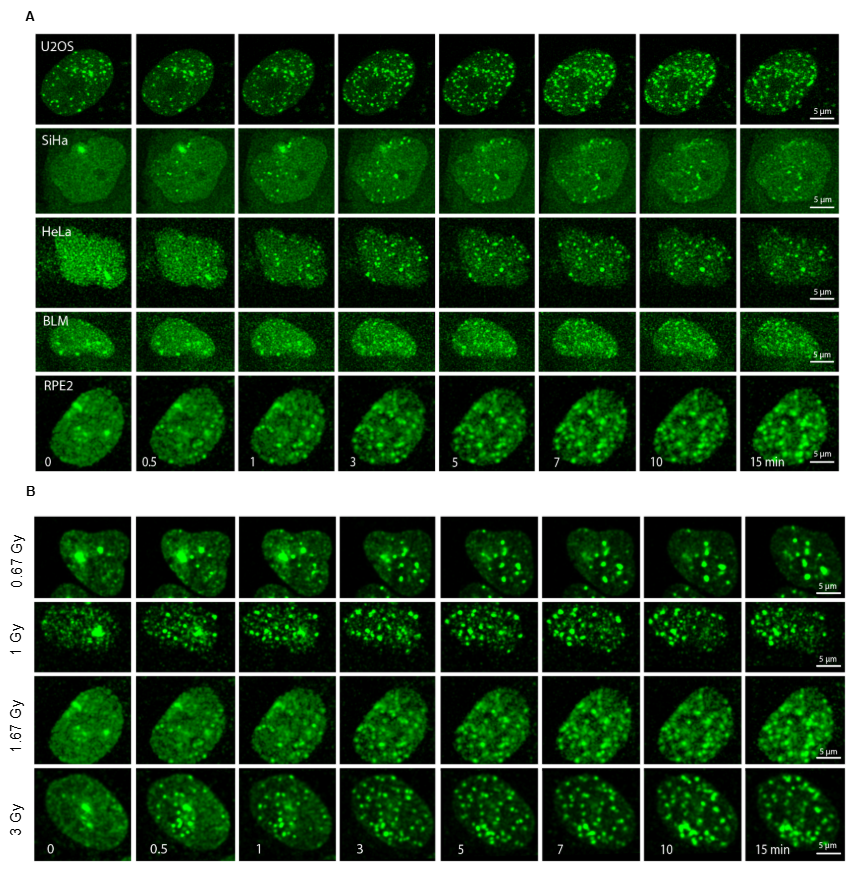


**Supplementary Figure 1.** **Foci formation kinetics is heterogeneous, cell line and dose dependent.** Representative images of different cell lines exposed to 1.67 Gy of ultra-soft X-rays (**A**) or ARPE-19 cells irradiated at different doses (**B**). Green - RNF168-Clover. Scale bar - 5 μm.


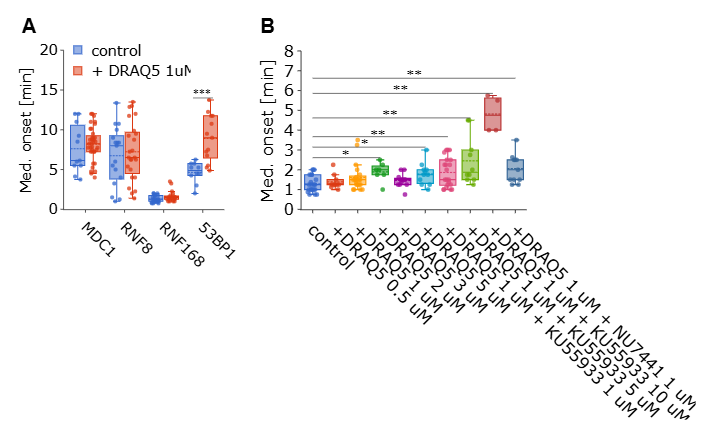


**Supplementary Figure 2.** Impact of DNA-binding dye DRAQ5 of foci onset. (**A**) Median foci onset for MDC1-, RNF8-, RNF168- and 53BP1-Clover expressing cells preincubated in normal medium or in the presence of 1 μm DRAQ5. (**B**) Medium foci onset of RNF168-Clover incubated in the presence of DRAQ5 and DNA repair inhibitors NU7441 and different concentrations of KU55933. More than 4 cells were analyzed per condition. (N cell ≥4).


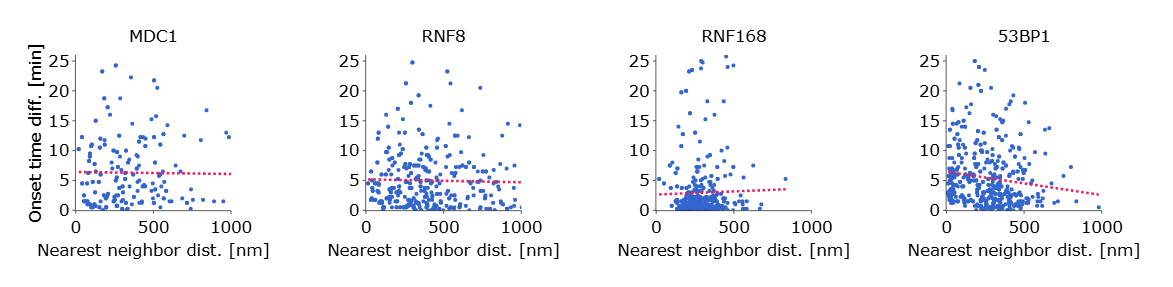


**Supplementary figure 3.** The onset of foci is not correlated with the distance between them. The plots show the relationship between the distance between nearest-neighbor foci pairs and the difference in the onset time of these foci. Lack of correlation indicates that even closely-spaced foci can be characterised by very different onset times, suggesting that foci onset is not entirely determined by large-scale chromatin structure or arrangement. Over 200 foci were analysed for each combination


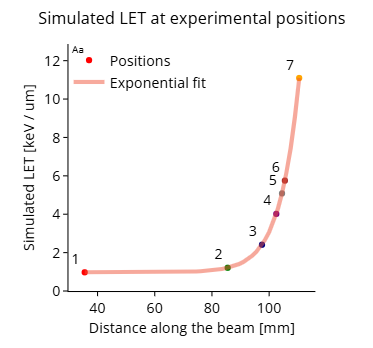


**Supplementary Figure 4.** Proton irradiation position and corresponding simulated linear LET profile with exponential fit.
